# Supplementary material for: Low-Magnitude High-Frequency Vibration Accelerated the Foot Wound Healing of n5-streptozotocin-induced Diabetic Rats by Enhancing Glucose Transporter 4 and Blood Microcirculation
Source: PubMed Central journal article supplement (PMC5599683; doi:10.1038/s41598-017-11934-2), 2017-09-14
Supplement: 41598_2017_11934_MOESM1_ESM.pdf [file 41598_2017_11934_MOESM1_ESM.pdf]

**Low-Magnitude High-Frequency Vibration Accelerated the Foot Wound Healing of n5-streptozotocin-induced Diabetic Rats by Enhancing Glucose Transporter 4 and Blood Microcirculation**

1. Caroline Oi-Ling Yu, Msc.  
5/F Lui Che Woo Clinical Sciences Building, Department of Orthopaedics and Traumatology,  
Prince of Wales Hospital, The Chinese University of Hong Kong, Shatin, Hong Kong  
Email: [Carolineyu@link.cuhk.edu.hk](mailto:Carolineyu@link.cuhk.edu.hk)
  
2. Kwok-Sui Leung, MD.  
Orthopaedic Learning Centre, 1/F, Li Ka Shing Specialist Clinics, North Wing, Prince of  
Wales Hospital.  
Email: [ksleung@cuhk.edu.hk](mailto:ksleung@cuhk.edu.hk)
  
3. Jonney Lei Jiang, PhD.  
Rm509A, Lo Kwee-Seong Integrated Biomedical Sciences Building, School of Biomedical  
Sciences, The Chinese University of Hong Kong  
Email: [heinzwg@163.com](mailto:heinzwg@163.com).
  
4. Tina Bai-Yan Wang, MMed.  
Rm509A, Lo Kwee-Seong Integrated Biomedical Sciences Building, School of Biomedical  
Sciences, The Chinese University of Hong Kong  
Email: [b127748@cuhk.edu.hk](mailto:b127748@cuhk.edu.hk)
  
5. Simon Kwoon-Ho Chow, PhD.  
5/F Lui Che Woo Clinical Sciences Building, Department of Orthopaedics and Traumatology,  
Prince of Wales Hospital, The Chinese University of Hong Kong, Shatin, Hong Kong  
Email: [skhchow@ort.cuhk.edu.hk](mailto:skhchow@ort.cuhk.edu.hk)
  
6. Wing-Hoi Cheung, PhD.\*  
5/F Lui Che Woo Clinical Sciences Building, Department of Orthopaedics and Traumatology,  
Prince of Wales Hospital, The Chinese University of Hong Kong, Shatin, Hong Kong  
Tel: (852) 3505-1559; Fax: (852) 2632-4618;  
Email: [louis@ort.cuhk.edu.hk](mailto:louis@ort.cuhk.edu.hk)

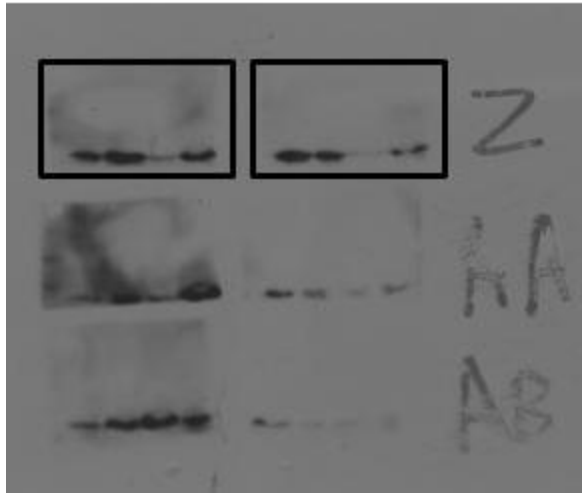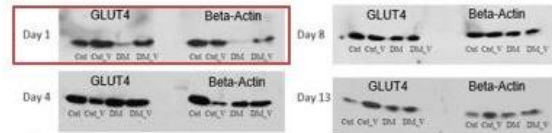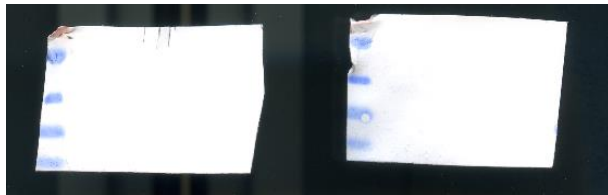

X-ray film of GLUT4 and beta-actin blots (aisle Z) at Day 1 post wounding. A scanned image of the molecular size markers on the PVDF membranes. Due to faint backgrounds on the developed x-ray films, the borders of each blot is approximated by its PVDF membrane.

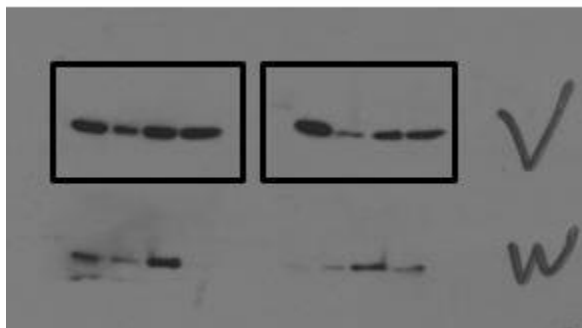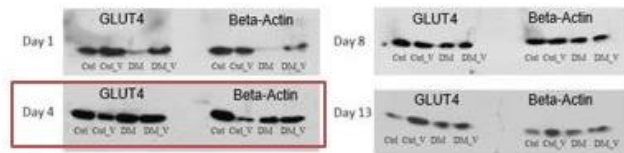

X-ray film of GLUT4 and beta-actin blots (aisle V) at Day 4 post wounding.

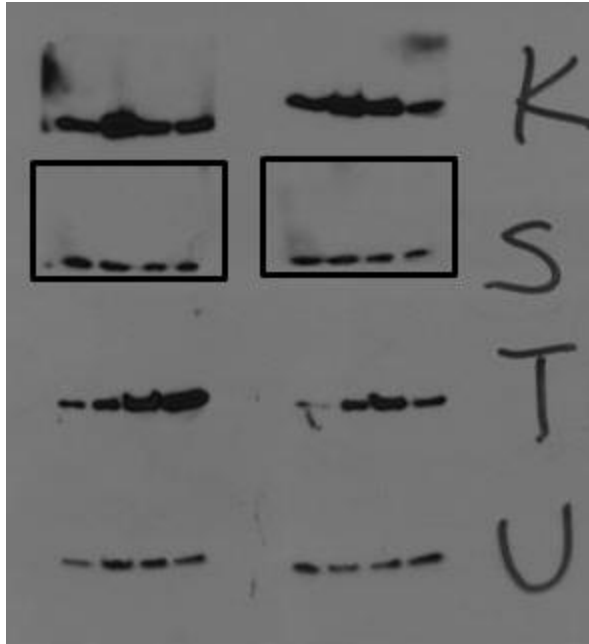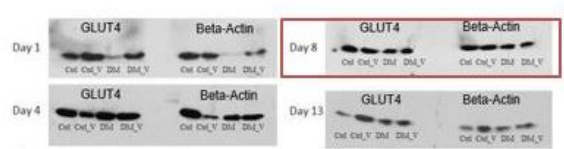

X-ray film of GLUT4 and beta-actin blots (aisle S) at Day 8 post wounding.

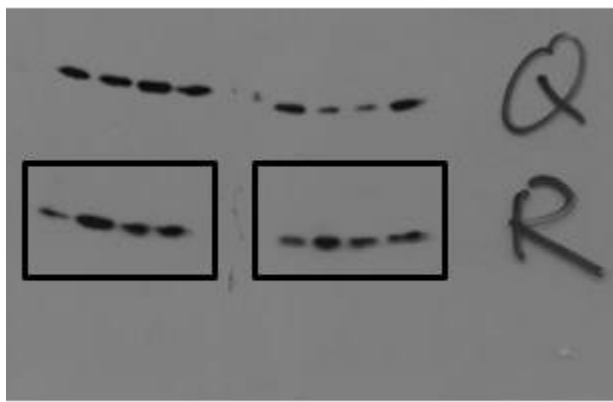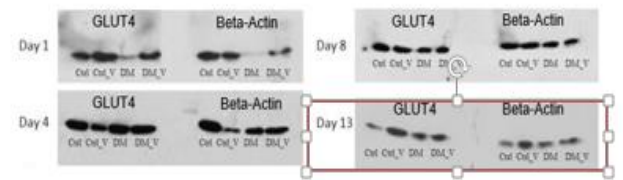

X-ray film of GLUT4 and beta-actin blots (aisle R) at Day 13 post wounding.
